# Supplementary material for: Gene Expression Profiles at Moxibustioned Site (ST36): A Microarray Analysis
Source: Hindawi journal article supplement (doi:10.1155/2013/890579), 2013-01-01
Supplement: f2 [file 890579.f2.pdf]

**Supplementary Table 2. The DEGs list under pathological condition (MMvsM)**

| <b>Oligo_id</b> | <b>Name</b> | <b>Fold Change</b> | <b>Oligo_id</b> | <b>Name</b> | <b>Fold Change</b> |
|-----------------|-------------|--------------------|-----------------|-------------|--------------------|
| Rn30018562      | Eraf        | 41.083244          | Rn30004066      | Fam36a      | 2.057539           |
| Rn30000745      | Hspa1b      | 27.571363          | Rn30010875      | RGD1560323  | 2.054533           |
| Rn30018964      | Mcpt8       | 22.952380          | Rn30004333      | -           | 2.041587           |
| Rn30008354      | Krt75       | 21.734422          | Rn30014802      | MGC94207    | 2.038315           |
| Rn30002705      | -           | 17.032027          | Rn30000366      | Pfdn6       | 2.037241           |
| Rn30005152      | Dapl1       | 16.453815          | Rn30001820      | -           | 2.004426           |
| Rn30002678      | -           | 14.932310          | Rn30011801      | C1qa        | 0.018447           |
| Rn30016143      | Obp3        | 14.916883          | Rn30008196      | Mmp3        | 0.020423           |
| R002437_01      | Tm4sf4      | 14.202362          | R003960_01      | Csf3        | 0.021640           |
| Rn30008966      | Cdkn3       | 13.251539          | Rn30008190      | Mmp3        | 0.029146           |
| Rn30022203      | RGD1564658  | 12.376319          | Rn30008192      | Mmp3        | 0.052190           |
| Rn30016778      | Ank1        | 11.486481          | R002729_01      | Cyr61       | 0.073092           |
| Rn30018284      | RGD1565787  | 11.370570          | Rn30012770      | Slpi        | 0.080789           |
| Rn30025543      | LOC500736   | 11.126715          | R002336_01      | -           | 0.082856           |
| Rn30021953      | -           | 11.019629          | Rn30002157      | Prg4        | 0.087210           |
| Rn30011324      | -           | 10.671160          | Rn30026013      | Lilrb4      | 0.095889           |
| Rn30005130      | Spic        | 10.283387          | Rn30017416      | -           | 0.099693           |
| Rn30013296      | -           | 10.004695          | Rn30002049      | -           | 0.113275           |
| Rn30015151      | Ns5atp9     | 9.343661           | R001406_01      | Ccl3        | 0.116901           |
| Rn30003045      | Asb11       | 9.035264           | Rn30023219      | Cxcl13      | 0.118303           |
| Rn30004711      | Srl         | 8.773841           | Rn30022370      | -           | 0.119984           |
| Rn30014222      | Ces3        | 8.597923           | R002312_01      | Pla2g2a     | 0.123126           |

| <b>Oligo_id</b> | <b>Name</b> | <b>Fold Change</b> | <b>Oligo_id</b> | <b>Name</b> | <b>Fold Change</b> |
|-----------------|-------------|--------------------|-----------------|-------------|--------------------|
| Rn30004655      | -           | 8.488780           | Rn30026019      | Lilrb4      | 0.123679           |
| Rn30018835      | Tacc2       | 8.478818           | Rn30004446      | -           | 0.125408           |
| Rn30006073      | Smyd1       | 8.389335           | R004548_01      | Ppp1r14c    | 0.140896           |
| Rn30014233      | Cdca3       | 8.346326           | Rn30017247      | Ugt1a1      | 0.146449           |
| Rn30017593      | -           | 8.303850           | Rn30022462      | -           | 0.146564           |
| Rn30026350      | -           | 8.133881           | Rn30015878      | Igsf6       | 0.152969           |
| Rn30022958      | Ckap2       | 8.055811           | Rn30008193      | Mmp10       | 0.156649           |
| Rn30006313      | RGD1304693  | 7.887529           | Rn30019531      | Ctss        | 0.166889           |
| Rn30016369      | Atp2b3      | 7.652867           | Rn30022690      | Fcgr3a      | 0.168175           |
| Rn30021553      | Ear11       | 7.595964           | R002882_01      | Timp1       | 0.168222           |
| Rn30011179      | -           | 7.549108           | Rn30007566      | Myo5a       | 0.169139           |
| Rn30009494      | Ear11       | 7.469758           | Rn30002801      | LOC498277   | 0.169486           |
| Rn30002673      | -           | 7.418829           | Rn30023425      | -           | 0.172619           |
| Rn30005086      | Aurkb       | 7.393346           | Rn30024065      | -           | 0.173695           |
| Rn30003246      | Igj         | 7.328226           | Rn30022401      | -           | 0.176577           |
| Rn30020892      | LOC364773   | 7.163163           | Rn30020062      | Clec4a1     | 0.176636           |
| Rn30020334      | RGD1310251  | 7.161664           | Rn30002797      | Fcgr2b      | 0.176964           |
| R000142_01      | Cdh1        | 7.051433           | Rn30026040      | -           | 0.180920           |
| Rn30016930      | -           | 6.964460           | Rn30008293      | -           | 0.182392           |
| R002501_01      | -           | 6.955927           | Rn30014857      | Cotl1       | 0.185676           |
| Rn30000254      | Fn3k        | 6.851828           | Rn30009651      | Dnajb14     | 0.186765           |
| R000038_01      | Pttg1       | 6.785596           | Rn30020063      | Clec4a1     | 0.187756           |
| Rn30007675      | RGD1559671  | 6.743277           | Rn30020273      | -           | 0.192524           |

| <b>Oligo_id</b> | <b>Name</b> | <b>Fold Change</b> | <b>Oligo_id</b> | <b>Name</b> | <b>Fold Change</b> |
|-----------------|-------------|--------------------|-----------------|-------------|--------------------|
| Rn30006807      | Smtnl1      | 6.707915           | R003618_01      | Slc2a3      | 0.193773           |
| R002677_01      | Nkg7        | 6.615996           | Rn30013130      | Stk11       | 0.195048           |
| R004692_01      | Lhx2        | 6.597168           | Rn30005980      | Nedd4       | 0.195602           |
| Rn30017136      | Ccnb1       | 6.334441           | Rn30012017      | Prc1        | 0.197535           |
| R004465_01      | Pcdh21      | 6.322125           | Rn30026876      | Slc28a2     | 0.197758           |
| Rn30021366      | -           | 6.304579           | Rn30023067      | -           | 0.202003           |
| Rn30020465      | Ctdspl2     | 6.287201           | Rn30017269      | -           | 0.202503           |
| Rn30018960      | Efna4       | 6.260781           | Rn30011163      | -           | 0.202811           |
| Rn30021747      | -           | 6.247623           | Rn30001094      | -           | 0.203318           |
| Rn30000067      | Rnase17     | 6.225851           | Rn30012434      | -           | 0.212644           |
| Rn30026814      | Bex4        | 6.224025           | Rn30002325      | Serpinb3a   | 0.213768           |
| Rn30006268      | Ctse        | 6.163654           | Rn30001575      | Eif4g1      | 0.217571           |
| Rn30014030      | Pbk         | 6.079240           | Rn30014962      | Ppp1r14c    | 0.222565           |
| Rn30002090      | Kcnj12      | 5.868604           | Rn30024709      | -           | 0.224277           |
| Rn30009390      | Chmp4c      | 5.778545           | Rn30011612      | -           | 0.227387           |
| Rn30000844      | -           | 5.760419           | Rn30016785      | -           | 0.227431           |
| R004229_01      | Ppbp        | 5.743860           | Rn30005732      | Samhd1      | 0.233371           |
| R004509_01      | Adipoq      | 5.721382           | Rn30006757      | Serping1    | 0.233464           |
| Rn30011659      | Pdlim3      | 5.720480           | Rn30016806      | -           | 0.235228           |
| R005310_01      | Hsph1       | 5.706119           | Rn30024525      | Hk3         | 0.241092           |
| Rn30004899      | -           | 5.702579           | Rn30004547      | Zfp36l2     | 0.243881           |
| Rn30016016      | -           | 5.692046           | Rn30008365      | -           | 0.244786           |
| Rn30010964      | Rasa2       | 5.657670           | Rn30013792      | Tex13b      | 0.244929           |

| <b>Oligo_id</b> | <b>Name</b> | <b>Fold Change</b> | <b>Oligo_id</b> | <b>Name</b> | <b>Fold Change</b> |
|-----------------|-------------|--------------------|-----------------|-------------|--------------------|
| Rn30020948      | -           | 5.623890           | Rn30011731      | -           | 0.245477           |
| Rn30011587      | Tlcd1       | 5.566018           | R001889_01      | Itgb7       | 0.245665           |
| Rn30016246      | Dennd2d     | 5.471729           | Rn30011035      | C1s         | 0.249626           |
| Rn30025297      | Slc5a3      | 5.417747           | R003495_01      | Cd14        | 0.250696           |
| Rn30019056      | Gzmb        | 5.384253           | Rn30006408      | -           | 0.257104           |
| Rn30003464      | Col1a1      | 5.377252           | Rn30004453      | Phf15       | 0.258588           |
| Rn30004900      | RGD1561776  | 5.356750           | R000009_01      | Enpp3       | 0.259257           |
| Rn30023050      | -           | 5.349726           | Rn30006438      | Myo1g       | 0.260811           |
| Rn30003462      | Col1a1      | 5.330135           | Rn30017105      | Ankrd1      | 0.261574           |
| Rn30023060      | -           | 5.329166           | Rn30009012      | -           | 0.263812           |
| Rn30024809      | Dhrs7c      | 5.310138           | Rn30005979      | Nedd4       | 0.263944           |
| Rn30002820      | Mpz         | 5.302353           | Rn30019958      | -           | 0.265354           |
| Rn30006081      | -           | 5.295778           | Rn30007801      | Batf        | 0.266631           |
| Rn30024948      | -           | 5.179125           | R003916_01      | -           | 0.266748           |
| Rn30002295      | Tnn         | 5.174581           | Rn30007882      | -           | 0.267612           |
| Rn30015724      | Pacrg       | 5.167651           | Rn30011246      | Itgb7       | 0.270174           |
| Rn30014003      | RGD1310784  | 5.123489           | Rn30013737      | Slc11a1     | 0.273338           |
| Rn30013876      | Ube2c       | 5.080434           | Rn30002798      | Fcgr3       | 0.274118           |
| Rn30011451      | -           | 5.048328           | Rn30019473      | Tnfaip8l2   | 0.274989           |
| Rn30018851      | Wnk4        | 5.043229           | Rn30017219      | Mgl1        | 0.275313           |
| Rn30006521      | Hspcal3     | 5.035602           | Rn30004279      | Myf5        | 0.278035           |
| Rn30001969      | RGD1310958  | 4.892431           | Rn30022430      | -           | 0.278644           |
| R004336_01      | Vegfc       | 4.858425           | Rn30022466      | -           | 0.279795           |

| <b>Oligo_id</b> | <b>Name</b> | <b>Fold Change</b> | <b>Oligo_id</b> | <b>Name</b> | <b>Fold Change</b> |
|-----------------|-------------|--------------------|-----------------|-------------|--------------------|
| Rn30005567      | Klhl31      | 4.852520           | Rn30019773      | Slfn8       | 0.281728           |
| Rn30013155      | -           | 4.831596           | Rn30020823      | -           | 0.283517           |
| Rn30017686      | Rhod        | 4.710167           | Rn30006415      | Lgmn        | 0.286307           |
| R004106_01      | Nr4a3       | 4.680434           | R001657_01      | Il4ra       | 0.292119           |
| Rn30019936      | -           | 4.668682           | Rn30025515      | Aph1b       | 0.294235           |
| Rn30014807      | Micalcl     | 4.643221           | Rn30004105      | Galntl1     | 0.298191           |
| Rn30023621      | Trdn        | 4.639911           | Rn30016804      | Errfi1      | 0.302994           |
| Rn30022390      | Fbxo5       | 4.576998           | R001297_01      | Apobec1     | 0.304338           |
| R000042_01      | Stmn1       | 4.555419           | Rn30014070      | Aox1        | 0.304623           |
| Rn30020026      | Dcakd       | 4.509214           | R002937_01      | Serpine1    | 0.311229           |
| Rn30024343      | Grem1       | 4.503192           | Rn30018768      | -           | 0.312202           |
| Rn30017451      | Mt3         | 4.492259           | Rn30008505      | Hck         | 0.313304           |
| Rn30008641      | -           | 4.474888           | Rn30026753      | -           | 0.315472           |
| Rn30021004      | -           | 4.449336           | Rn30023637      | -           | 0.315689           |
| Rn30019475      | Scn1b       | 4.407642           | Rn30008846      | Tnnt2       | 0.317458           |
| Rn30018668      | Kif22       | 4.398701           | Rn30014156      | -           | 0.319465           |
| Rn30006390      | Atp1b4      | 4.203583           | R002652_01      | Ifngr1      | 0.321670           |
| R001375_01      | -           | 4.120092           | Rn30009206      | Clecsf6     | 0.321890           |
| Rn30022142      | Fndc5       | 4.094028           | Rn30022563      | Plaur       | 0.326060           |
| Rn30007828      | Mal2        | 4.062913           | R002843_01      | Gda         | 0.326300           |
| Rn30012901      | -           | 3.994770           | Rn30000608      | -           | 0.328782           |
| Rn30016881      | Nt5dc2      | 3.934200           | Rn30020329      | -           | 0.331149           |
| Rn30023140      | -           | 3.838821           | R000080_01      | Cst3        | 0.333240           |

| <b>Oligo_id</b> | <b>Name</b> | <b>Fold Change</b> | <b>Oligo_id</b> | <b>Name</b> | <b>Fold Change</b> |
|-----------------|-------------|--------------------|-----------------|-------------|--------------------|
| Rn30002155      | Mfap4       | 3.775512           | Rn30000186      | -           | 0.337909           |
| Rn30018211      | Dyrk4       | 3.760977           | Rn30012836      | Il6st       | 0.341391           |
| Rn30004691      | Tcfap2c     | 3.725994           | Rn30009586      | Dync1li1    | 0.341404           |
| Rn30002016      | Yipf7       | 3.716659           | R004525_01      | Psmb8       | 0.343032           |
| Rn30018961      | -           | 3.665483           | Rn30006689      | Per1        | 0.343255           |
| Rn30008218      | Asb2        | 3.624158           | Rn30013701      | -           | 0.344315           |
| Rn30003648      | Trib1       | 3.614713           | Rn30001184      | Fam20c      | 0.344458           |
| Rn30023927      | -           | 3.607788           | R002180_01      | Eif4ebp1    | 0.345158           |
| Rn30015077      | RGD1565202  | 3.586203           | R004337_01      | Litaf       | 0.346097           |
| R002663_01      | Hspb3       | 3.582775           | R004187_01      | Fgl2        | 0.346351           |
| Rn30020690      | RGD1565395  | 3.537159           | Rn30000609      | -           | 0.347283           |
| Rn30015282      | Idi1        | 3.533668           | Rn30016744      | Slc28a2     | 0.349172           |
| R000447_01      | Wfdc1       | 3.528646           | R000055_01      | Pdpm        | 0.350188           |
| Rn30007732      | Dbf4        | 3.481672           | R004620_01      | Cryab       | 0.350700           |
| Rn30017437      | Tnnc1       | 3.462212           | Rn30000541      | Ptpnc       | 0.351050           |
| R005385_01      | Drg1        | 3.455561           | Rn30013132      | Fn1         | 0.359370           |
| Rn30012085      | -           | 3.446518           | Rn30007859      | Igfbp3      | 0.361284           |
| Rn30015226      | -           | 3.425474           | R002658_01      | Fcna        | 0.362465           |
| Rn30000013      | Tcf15       | 3.391982           | Rn30009900      | Aig1        | 0.364591           |
| R003568_01      | Jun         | 3.387341           | Rn30012429      | Rassf4      | 0.365033           |
| Rn30021710      | RGD1561694  | 3.375652           | Rn30020829      | Fkbp5       | 0.367902           |
| R000524_01      | Hpd         | 3.373605           | Rn30000167      | Ccl7        | 0.368221           |
| Rn30009002      | Ttk         | 3.363693           | Rn30000963      | Zdhhc4      | 0.369900           |

| <b>Oligo_id</b> | <b>Name</b> | <b>Fold Change</b> | <b>Oligo_id</b> | <b>Name</b> | <b>Fold Change</b> |
|-----------------|-------------|--------------------|-----------------|-------------|--------------------|
| Rn30009399      | -           | 3.339260           | Rn30015171      | Serpinb1a   | 0.370152           |
| Rn30000432      | -           | 3.307280           | Rn30017075      | Ctsl        | 0.371382           |
| Rn30014500      | Rbp7        | 3.306085           | Rn30014231      | Pja2        | 0.373157           |
| Rn30004743      | -           | 3.248698           | Rn30015177      | Ninj1       | 0.376058           |
| Rn30011831      | -           | 3.212814           | Rn30016926      | -           | 0.377316           |
| Rn30010060      | Ermp1       | 3.191089           | Rn30013573      | -           | 0.378261           |
| Rn30008280      | Prkar2b     | 3.187954           | Rn30011077      | B3galnt1    | 0.378857           |
| Rn30011533      | -           | 3.173498           | Rn30000668      | -           | 0.384845           |
| Rn30021092      | Pphln1      | 3.172590           | Rn30010874      | Sgk1        | 0.385900           |
| Rn30009941      | Esm1        | 3.145577           | Rn30016528      | Serpinb6a   | 0.387524           |
| R002900_01      | Tnmd        | 3.132247           | Rn30016793      | Ampd3       | 0.389024           |
| Rn30015424      | Cmtm5       | 3.131047           | Rn30024749      | Ppap2a      | 0.389570           |
| Rn30011141      | Ltbp2       | 3.117497           | R000368_01      | Vim         | 0.391799           |
| R000222_01      | Rgs2        | 3.111061           | Rn30016235      | -           | 0.392560           |
| Rn30001287      | Cux1        | 3.103367           | Rn30000362      | RT1-A2      | 0.395508           |
| Rn30018684      | Usmg5       | 3.088809           | R000068_01      | Fmo1        | 0.395835           |
| Rn30010579      | -           | 3.083949           | Rn30005619      | -           | 0.396010           |
| Rn30016179      | Srd5a1      | 3.075238           | Rn30002249      | Expi        | 0.396217           |
| Rn30002459      | Areg        | 3.066883           | Rn30002059      | Naaa        | 0.396580           |
| Rn30018467      | Tex101      | 3.047022           | Rn30018080      | Pgpep1      | 0.398860           |
| Rn30018070      | Hacl1       | 3.025972           | Rn30012174      | Sdccag10    | 0.399389           |
| Rn30019310      | Capn1       | 3.018641           | R000806_01      | Emp3        | 0.399617           |
| Rn30009609      | -           | 3.010926           | R003915_01      | Hspb8       | 0.400687           |

| <b>Oligo_id</b> | <b>Name</b> | <b>Fold Change</b> | <b>Oligo_id</b> | <b>Name</b> | <b>Fold Change</b> |
|-----------------|-------------|--------------------|-----------------|-------------|--------------------|
| Rn30014572      | Bub1        | 2.981897           | R001319_01      | Mvp         | 0.401162           |
| R001836_01      | Cpa3        | 2.973647           | R001476_01      | Adm         | 0.401639           |
| Rn30022620      | RGD1565350  | 2.966221           | Rn30005642      | Ptges       | 0.402358           |
| R003045_01      | Omd         | 2.944932           | R004277_01      | Tmem49      | 0.406021           |
| R000968_01      | S100b       | 2.928927           | Rn30018564      | Reep5       | 0.406500           |
| Rn30008506      | RGD1311874  | 2.922055           | Rn30019436      | Fxyd5       | 0.406858           |
| R005101_01      | Stard10     | 2.915885           | Rn30010858      | C1r         | 0.407150           |
| R003150_01      | Sqle        | 2.914396           | R001662_01      | Ptpnc       | 0.411062           |
| Rn30017622      | RGD1308113  | 2.909244           | R002625_01      | Jak2        | 0.414560           |
| Rn30026696      | Pak1        | 2.908412           | Rn30019113      | Cdc25a      | 0.414820           |
| Rn30006896      | C1qtnf5     | 2.903335           | Rn30006391      | Adfp        | 0.416464           |
| Rn30018049      | Trpv3       | 2.873781           | R002604_01      | Alox5ap     | 0.417893           |
| Rn30003785      | Pole2       | 2.872745           | Rn30003498      | -           | 0.418772           |
| Rn30024466      | Parva       | 2.856097           | Rn30020794      | Plp2        | 0.419623           |
| Rn30000995      | Tesc        | 2.841624           | Rn30002177      | RGD1359713  | 0.420936           |
| Rn30016524      | Golga7      | 2.832906           | Rn30024944      | -           | 0.421926           |
| Rn30013879      | -           | 2.829917           | Rn30013301      | Smc5        | 0.422578           |
| Rn30008047      | Ttc5        | 2.825991           | R000212_01      | Tspo        | 0.422600           |
| R002962_01      | Amd1        | 2.822354           | Rn30025127      | -           | 0.423429           |
| Rn30014595      | -           | 2.818882           | Rn30003742      | -           | 0.423892           |
| Rn30018347      | Rhot2       | 2.816808           | Rn30004208      | -           | 0.425732           |
| Rn30001810      | -           | 2.796143           | Rn30018690      | Lsp1        | 0.426702           |
| Rn30014276      | -           | 2.784631           | Rn30023787      | Wdr41       | 0.426859           |

| <b>Oligo_id</b> | <b>Name</b> | <b>Fold Change</b> | <b>Oligo_id</b> | <b>Name</b> | <b>Fold Change</b> |
|-----------------|-------------|--------------------|-----------------|-------------|--------------------|
| Rn30021967      | -           | 2.777963           | Rn30003090      | Ifi204      | 0.426872           |
| Rn30024620      | RGD1304876  | 2.759393           | Rn30024110      | Cfp         | 0.428124           |
| Rn30000244      | -           | 2.751578           | Rn30017240      | Pnpla2      | 0.429275           |
| R004431_01      | Selenbp1    | 2.739851           | Rn30000361      | -           | 0.429775           |
| Rn30007326      | -           | 2.727273           | Rn30003243      | -           | 0.430148           |
| Rn30021040      | -           | 2.709343           | R002756_01      | Fst         | 0.434164           |
| Rn30017232      | Rad9        | 2.705835           | R002856_01      | Map4k3      | 0.435397           |
| Rn30006911      | Zmynd17     | 2.704061           | Rn30024020      | -           | 0.436177           |
| Rn30007758      | Pdlim2      | 2.687595           | R003898_01      | Bid         | 0.437166           |
| Rn30006157      | -           | 2.678904           | Rn30000743      | Fhl1        | 0.437220           |
| Rn30013029      | -           | 2.674300           | Rn30006692      | Nfkbia      | 0.437327           |
| R003656_01      | Gpd1        | 2.664541           | Rn30001856      | LOC289482   | 0.437490           |
| Rn30012424      | Mat2a       | 2.643980           | Rn30022686      | -           | 0.438849           |
| Rn30005463      | Lynx1       | 2.628148           | Rn30006244      | Arhgap9     | 0.441880           |
| Rn30014755      | Ankrd23     | 2.605204           | Rn30015393      | Phyhd1      | 0.442472           |
| R000432_01      | Lum         | 2.582738           | Rn30015029      | Tyr         | 0.443632           |
| R004038_01      | -           | 2.564791           | Rn30012141      | Hmha1       | 0.444503           |
| Rn30019238      | Tdrkh       | 2.547205           | Rn30012210      | Mgst2       | 0.444838           |
| Rn30010472      | Slc37a4     | 2.539644           | R000942_01      | Fez2        | 0.447250           |
| R002978_01      | Hspa4       | 2.530917           | Rn30009825      | Wisp2       | 0.447318           |
| Rn30018297      | Matr3       | 2.468580           | Rn30010542      | RGD1561205  | 0.448085           |
| R005497_01      | Mlf1        | 2.422589           | Rn30014232      | Pja2        | 0.449046           |
| Rn30001603      | Tfrc        | 2.414134           | Rn30020811      | -           | 0.451590           |

| <b>Oligo_id</b> | <b>Name</b> | <b>Fold Change</b> | <b>Oligo_id</b> | <b>Name</b> | <b>Fold Change</b> |
|-----------------|-------------|--------------------|-----------------|-------------|--------------------|
| R003751_01      | Scg2        | 2.408769           | Rn30004700      | -           | 0.452181           |
| Rn30008176      | Irak1bp1    | 2.405833           | R002584_01      | Nr2f2       | 0.452891           |
| Rn30026657      | -           | 2.398906           | Rn30017768      | Tspan4      | 0.453948           |
| R005080_01      | Tm9sf3      | 2.392445           | R003575_01      | Batf3       | 0.453988           |
| Rn30019324      | Pthr1       | 2.387292           | Rn30015949      | Fbxw4       | 0.454251           |
| Rn30021903      | -           | 2.386393           | Rn30008719      | Rpo1-4      | 0.454915           |
| Rn30009296      | Pdcd10      | 2.378538           | R000450_01      | Slc2a1      | 0.455179           |
| R003400_01      | Mb          | 2.364087           | Rn30006831      | -           | 0.456476           |
| Rn30000189      | -           | 2.360489           | Rn30005065      | RGD1564065  | 0.458225           |
| Rn30001405      | Atp5j       | 2.341693           | Rn30000360      | RT1-A3      | 0.460989           |
| Rn30018460      | Slc7a6os    | 2.324999           | Rn30009697      | Mrpl45      | 0.461327           |
| Rn30008261      | Sec62       | 2.304420           | Rn30016002      | Apob48r     | 0.463604           |
| Rn30010601      | Pick1       | 2.300075           | Rn30003601      | -           | 0.465082           |
| Rn30008039      | Orc1l       | 2.298594           | Rn30009029      | Il18        | 0.467233           |
| Rn30010276      | Arsb        | 2.282641           | R004296_01      | Carhsp1     | 0.470142           |
| Rn30014397      | Parva       | 2.278451           | Rn30008323      | Mad2l2      | 0.470532           |
| Rn30010270      | -           | 2.275979           | Rn30006528      | -           | 0.470765           |
| Rn30010677      | -           | 2.266042           | Rn30011252      | -           | 0.474175           |
| Rn30018587      | -           | 2.263712           | Rn30013053      | Fam119a     | 0.475317           |
| R002892_01      | Car2        | 2.249938           | Rn30016375      | LOC39692    | 0.477302           |
| Rn30019356      | Tm7sf2      | 2.230323           | Rn30000298      | Gopc        | 0.477984           |
| Rn30018311      | Sgta        | 2.221152           | R000678_01      | Grn         | 0.479389           |
| Rn30019269      | Dpf2        | 2.216393           | Rn30015017      | Rnh1        | 0.479422           |

| <b>Oligo_id</b> | <b>Name</b> | <b>Fold Change</b> | <b>Oligo_id</b> | <b>Name</b> | <b>Fold Change</b> |
|-----------------|-------------|--------------------|-----------------|-------------|--------------------|
| Rn30021571      | Cenpm       | 2.215065           | Rn30025372      | -           | 0.480885           |
| Rn30006523      | Dut-ps      | 2.208066           | Rn30000352      | Hla-dma     | 0.481522           |
| Rn30015559      | -           | 2.201706           | R003693_01      | Slco2b1     | 0.481547           |
| Rn30009659      | -           | 2.195713           | Rn30012728      | Arhgap17    | 0.482323           |
| Rn30000773      | Usp1        | 2.174628           | R000846_01      | Ripk3       | 0.482466           |
| Rn30004914      | -           | 2.171575           | Rn30015819      | Tcirg1      | 0.482773           |
| Rn30013007      | Rbm15b      | 2.137839           | Rn30002405      | Lamc1       | 0.483298           |
| Rn30011001      | Abhd14a     | 2.137585           | Rn30008905      | Praf2       | 0.483707           |
| Rn30016600      | Mrpl48      | 2.127500           | Rn30011774      | -           | 0.486360           |
| Rn30009109      | Cib2        | 2.122372           | Rn30018582      | Ahnak       | 0.486533           |
| Rn30004521      | Ube2t       | 2.119026           | Rn30001421      | -           | 0.486746           |
| Rn30010641      | Sub1        | 2.118062           | Rn30003602      | Glipr1      | 0.487234           |
| Rn30015911      | RGD1359529  | 2.117040           | Rn30007540      | -           | 0.491614           |
| Rn30001332      | Eln         | 2.112027           | R000612_01      | -           | 0.492266           |
| Rn30007194      | Cgref1      | 2.092496           | Rn30024910      | -           | 0.492421           |
| Rn30021651      | -           | 2.081677           | R002276_01      | Lcn2        | 0.494408           |
| R002109_01      | Rgs4        | 2.072322           | Rn30010179      | Laptm5      | 0.495186           |
| Rn30011282      | RGD1305288  | 2.065939           | Rn30010425      | Uhrf2       | 0.495417           |
| Rn30017130      | Plekhb1     | 2.063137           | R004088_01      | Eef2        | 0.498952           |
| R003734_01      | Trpv2       | 2.061259           | R000911_01      | Abcg1       | 0.499568           |

Note:- unknown.
