# Supplementary material for: Gene Expression Profiles at Moxibustioned Site (ST36): A Microarray Analysis
Source: Hindawi journal article supplement (doi:10.1155/2013/890579), 2013-01-01
Supplement: f3 [file 890579.f3.pdf]

**Supplementary Table 3 Co-expressed genes list between physiological and pathological condition**

| <b>DEG_Overlap</b>      | <b>oligo_id</b> | <b>Name</b> | <b>Fold Change (CM/C)</b> | <b>Fold Change(MM/M)</b> |
|-------------------------|-----------------|-------------|---------------------------|--------------------------|
| <b>Co-upregulated</b>   | Rn30018562      | Eraf        | 18.397200                 | 41.083244                |
|                         | Rn30016778      | Ank1        | 15.972224                 | 11.486481                |
|                         | Rn30003045      | Asb11       | 3.441989                  | 9.035264                 |
|                         | Rn30016369      | Atp2b3      | 5.194801                  | 7.652867                 |
|                         | Rn30011179      | -           | 11.798765                 | 7.549108                 |
|                         | Rn30000254      | Fn3k        | 11.928077                 | 6.851828                 |
|                         | Rn30002090      | Kcnj12      | 5.833567                  | 5.868604                 |
|                         | Rn30011659      | Pdlim3      | 6.614194                  | 5.720480                 |
|                         | Rn30024809      | Dhrs7c      | 3.237871                  | 5.310138                 |
|                         | Rn30002820      | Mpz         | 6.395825                  | 5.302353                 |
|                         | Rn30023621      | Trdn        | 3.291266                  | 4.639911                 |
|                         | Rn30017451      | Mt3         | 3.062838                  | 4.492259                 |
|                         | Rn30002016      | Yipf7       | 3.847752                  | 3.716659                 |
|                         | Rn30018049      | Trpv3       | 2.343382                  | 2.873781                 |
|                         | Rn30000995      | Tesc        | 2.039232                  | 2.841624                 |
|                         | R003734_01      | Trpv2       | 2.014405                  | 2.061259                 |
| <b>Co-downregulated</b> | Rn30002249      | Expi        | 0.246569                  | 0.396217                 |
|                         | Rn30013792      | Tex13b      | 0.181003                  | 0.244929                 |
|                         | Rn30005732      | Samhd1      | 0.337236                  | 0.233371                 |
|                         | Rn30011612      | -           | 0.453904                  | 0.227387                 |
|                         | Rn30002325      | Serpib3a    | 0.181611                  | 0.213768                 |
|                         | Rn30017247      | Ugt1a1      | 0.474866                  | 0.146449                 |
