# Supplementary material for: Gene Expression Profiles at Moxibustioned Site (ST36): A Microarray Analysis
Source: Evid Based Complement Alternat Med. 2013 Sep 22;2013:890579. doi: 10.1155/2013/890579 (PMC3807720; doi:10.1155/2013/890579)
Supplement: Supplementary file 1 — Supplementary Table 1: The DEGs list under physiological condition (CM versus C) Supplementary Table 2: The DEGs list under pathological condition (MM versus M) Supplementary Table 3: Co-expressed genes list between physiological and pathological condition. [file 890579.f1.zip]

Archive with 4 entries (3 files):
- supplementary data/
- supplementary data/S1-The DEGs list under physiological condition (CMvsC).doc
- supplementary data/S2-The DEGs list under pathological condition (MMvsM).doc
- supplementary data/S3-Co-expressed genes list between physiological and pathological condition .doc
